# Supplementary material
Source: bioRxiv or medRxiv preprint supplement (https://www.biorxiv.org/highwire/filestream/130684/field_highwire_adjunct_files/0/290296-1.pdf)

Supplementary Figure 1

**a**

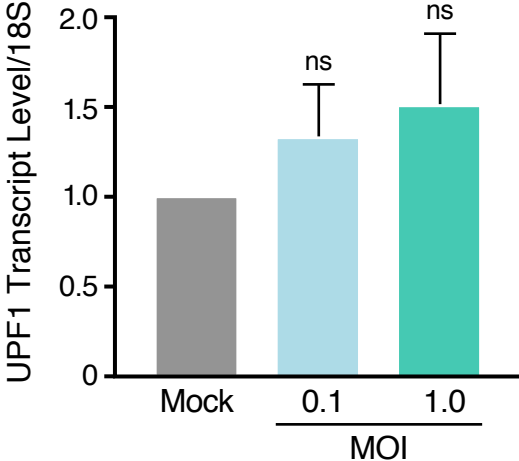

**b**

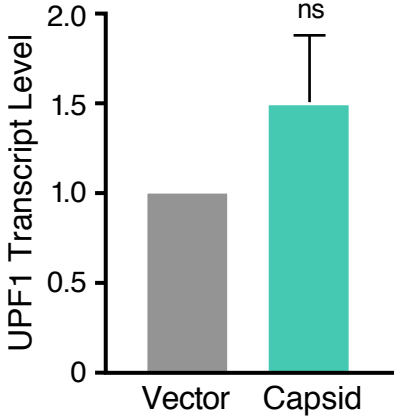

## Supplementary Figure 2

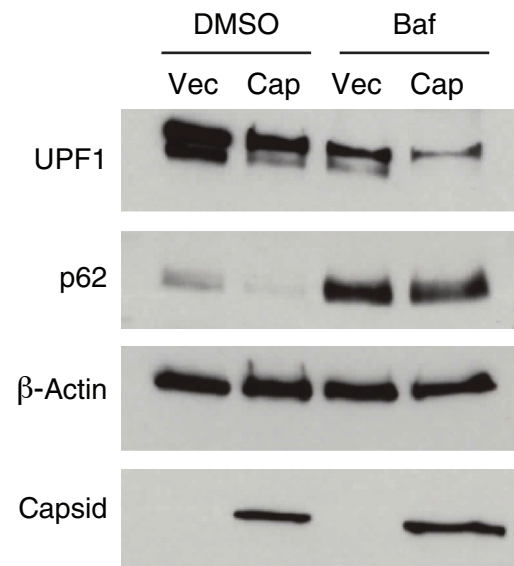

Supplementary Figure 3

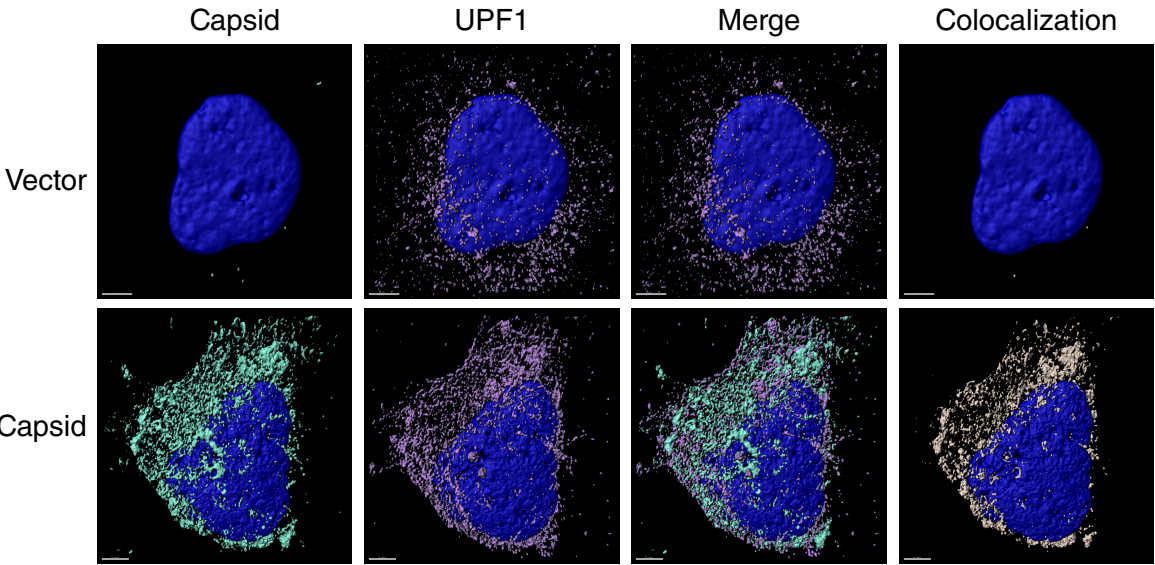

Supplement: Supplementary file [file 290296-1.pdf]
